# Supplementary material for: Towards a graphene semi/hybrid-nanogap: a new architecture for ultrafast DNA sequencing
Source: Royal Society of Chemistry journal article supplement (doi:10.1039/d2nr05200h), 2022-10-31
Supplement: d2nr05200h1.pdf [file d2nr05200h1.pdf]

## *Supplementary Information*

# **Towards Graphene Semi/Hybrid-Nanogap: A New Architecture for Ultrafast DNA Sequencing**

Sneha Mittal, † Biswarup Pathak\*, †

†Department of Chemistry, Indian Institute of Technology (IIT) Indore, Indore, Madhya Pradesh, 453552, India

\*E-mail: [biswarup@iiti.ac.in](mailto:biswarup@iiti.ac.in)

## **CONTENTS**

1. Representative in-plane rotation orientations of A-nucleobase inside the graphene semi/hybrid-nanogap.
2. TDOS plot for pristine graphene semi/hybrid-nanogap device at three different k-points.
3. Top and side views of energetically stable structures of graphene semi/hybrid-nanogap+nucleobase analog (1dzC and 3dzT) systems.
4. Change in the transmission function spectra of graphene semi/hybrid-nanogap+pyrimidine nucleobase systems due to highly conductive analogs.
5. Scheme of A-nucleobase translated inplane along the z-axis in both positive and negative directions by  $\pm 0.5 \text{ \AA}$  inside the graphene semi/hybrid-nanogap.
6. Scheme of A-nucleobase translated out-of-plane along the x-axis in positive and negative directions by  $\pm 1.0 \text{ \AA}$  inside the graphene semi/hybrid-nanogap.
7. Variation in the transmission function spectra of graphene semi/hybrid nanogap+nucleobase systems due to in-plane rotations.
8. Change in the transmission spectra of graphene semi/hybrid-nanogap+nucleobase systems due to in-plane lateral translations.
9. Change in the transmission spectra of graphene semi/hybrid-nanogap+nucleobase systems due to out-of-plane translations.

**1. Representative in-plane rotation orientations of A-nucleobase inside the graphene semi/hybrid-nanogap:**

**Scheme S1: Rotation of A-nucleobase inside the graphene semi/hybrid-nanogap:** We have considered all possible rotations from  $0^\circ$  to  $180^\circ$  around the x-axis in the yz-plane for all four DNA nucleobases inside the graphene semi/hybrid-nanogap as shown in **Figure S1**.

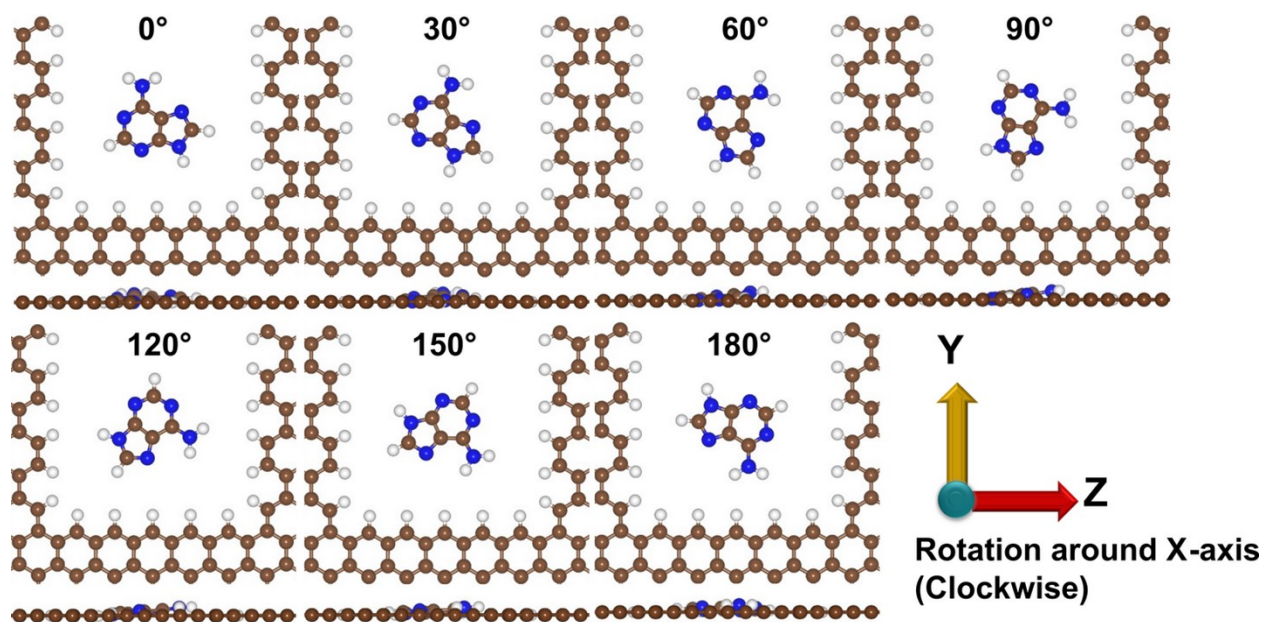

**Figure S1:** Representative orientations of A-nucleobase inside the graphene semi/hybrid-nanogap are illustrated, corresponding to rotations from  $0^\circ$  to  $180^\circ$  in the steps of  $30^\circ$  around the x-axis in the yz-plane.

**Table S1.** Relative energies (in eV) of the graphene semi/hybrid-nanogap+nucleobase systems when nucleobases are interacting with graphene semi/hybrid-nanogap edges at different orientations ( $0^\circ$  to  $180^\circ$ ), as shown in **Figure S1**.

| Nucleobases | $0^\circ$   | $30^\circ$ | $60^\circ$  | $90^\circ$  | $120^\circ$ | $150^\circ$ | $180^\circ$ |
|-------------|-------------|------------|-------------|-------------|-------------|-------------|-------------|
| A           | <b>0.00</b> | 0.44       | 0.49        | 0.55        | 0.03        | 0.09        | 0.04        |
| G           | 0.13        | 0.73       | 0.39        | <b>0.00</b> | 0.50        | 1.09        | 1.21        |
| C           | 0.08        | 0.27       | <b>0.00</b> | 0.01        | 0.06        | 0.73        | 0.85        |
| T           | 0.17        | 0.57       | 0.63        | 0.64        | 0.47        | <b>0.00</b> | 0.43        |

**2. Total density of states (TDOS) plot for pristine graphene semi/hybrid-nanogap device at different k-points:**

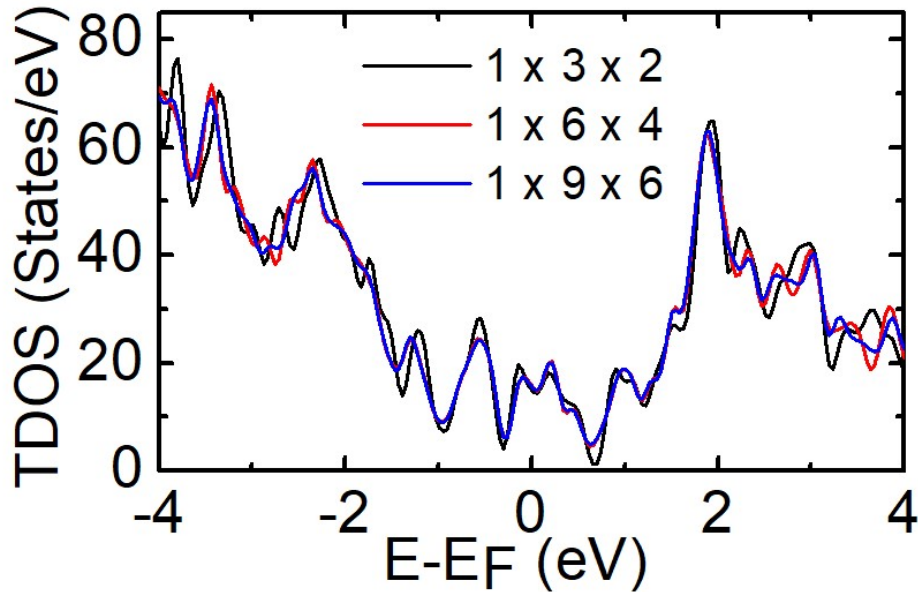

**Figure S2:** TDOS plot for pristine graphene semi/hybrid-nanogap device at three different k-points:  $1 \times 3 \times 2$ ,  $1 \times 6 \times 4$ , and  $1 \times 9 \times 6$ . The Fermi energy level ( $E-E_F$ ) has been aligned to zero.

3. Top and side views of energetically stable structures of graphene semi/hybrid-nanogap+nucleobase-analog (1dzC and 3dzT) systems:

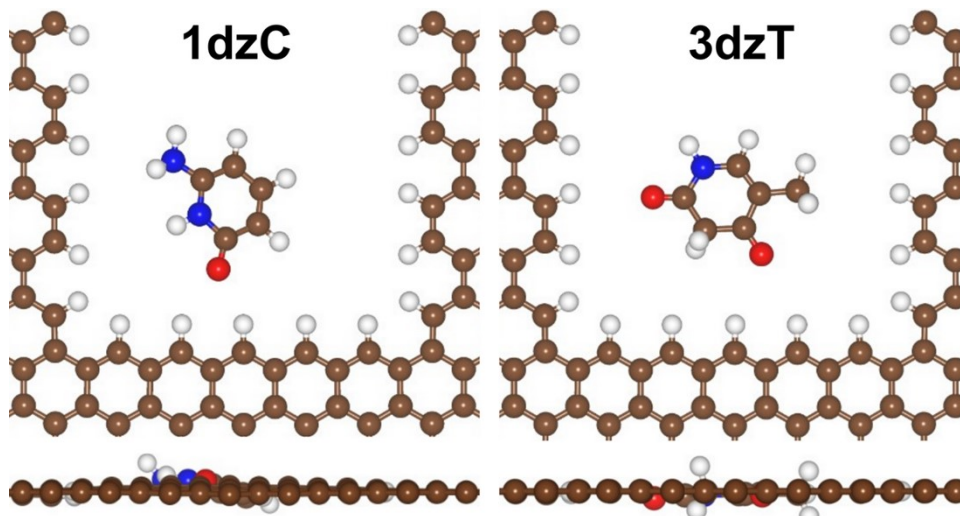

**Figure S3.** Top and side views of energetically stable structures of graphene semi/hybrid-nanogap+nucleobase-analog (1dzC and 3dzT) systems. Brown, white, blue, and red balls represent C, H, N, and O atoms, respectively.

4. Change in the zero-bias transmission spectra of graphene semi/hybrid nanogap+pyrimidine nucleobase systems due to highly conductive analogs:

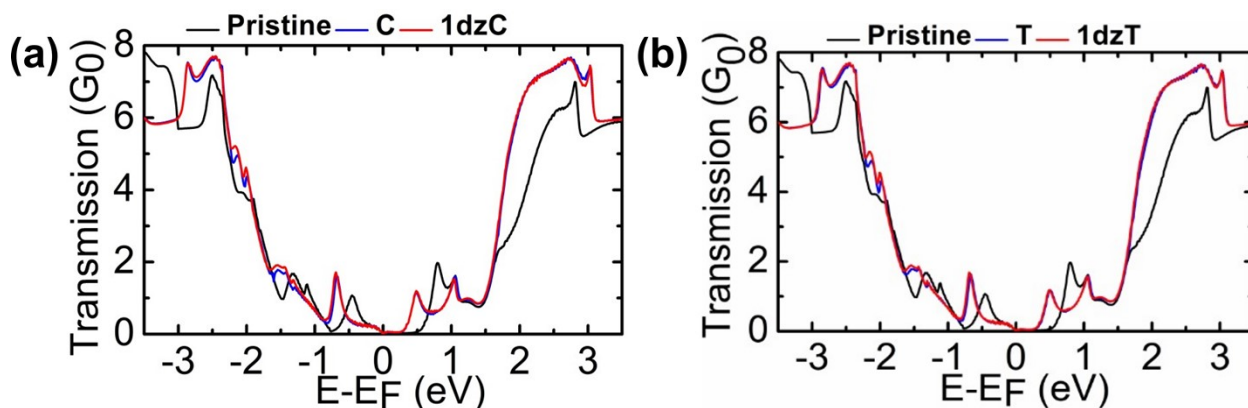

**Figure S4.** (a) Variation in the zero-bias transmission spectra of C when replaced by the analog 1dzC and (b) variation in the zero-bias transmission spectra of T when replaced by the analog 3dzT. The Fermi level has been set to zero.

**5. Representative lateral translations of A-nucleobase inside the graphene semi/hybrid-nanogap:**

**Scheme S2: Lateral translations of A-nucleobase inside the graphene semi/hybrid-nanogap:**

We have translated all four nucleobases in both forward (+0.5 Å) and backward (-0.5 Å) directions from the initial position (0.0 Å) inside the graphene semi/hybrid-nanogap as shown in **Figure S5**.

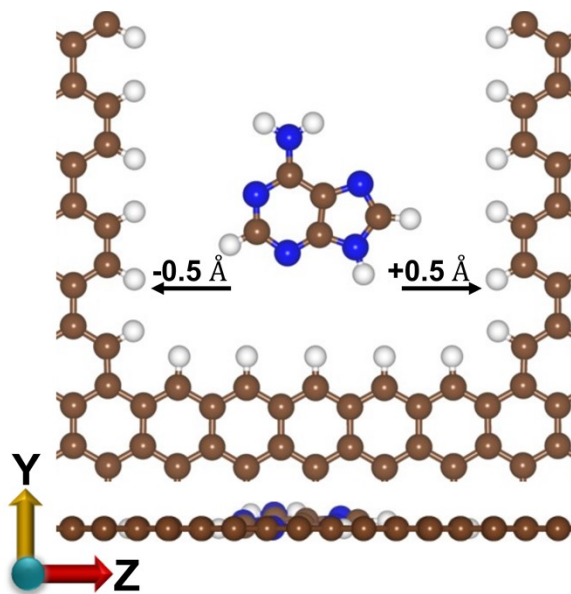

**Figure S5:** Scheme of A-nucleobase translated inplane along the z-axis in positive and negative directions by  $\pm 0.5 \text{ \AA}$  inside the graphene semi/hybrid-nanogap in the xy-plane.

**6. Scheme of A-nucleobase translated out-of-plane along the x-axis in positive and negative directions by  $\pm 1.0 \text{ \AA}$  inside the graphene semi/hybrid-nanogap:**

**Scheme S3: Out-of-plane translation of A-nucleobase inside the graphene semi/hybrid-nanogap:**

We have translated all four DNA nucleobases in both upward (+1.0 Å) and downward (-1.0 Å) directions from the initial position (0.0 Å) along the x-axis in the yz-plane inside the graphene semi/hybrid-nanogap as shown in **Figure S6**.

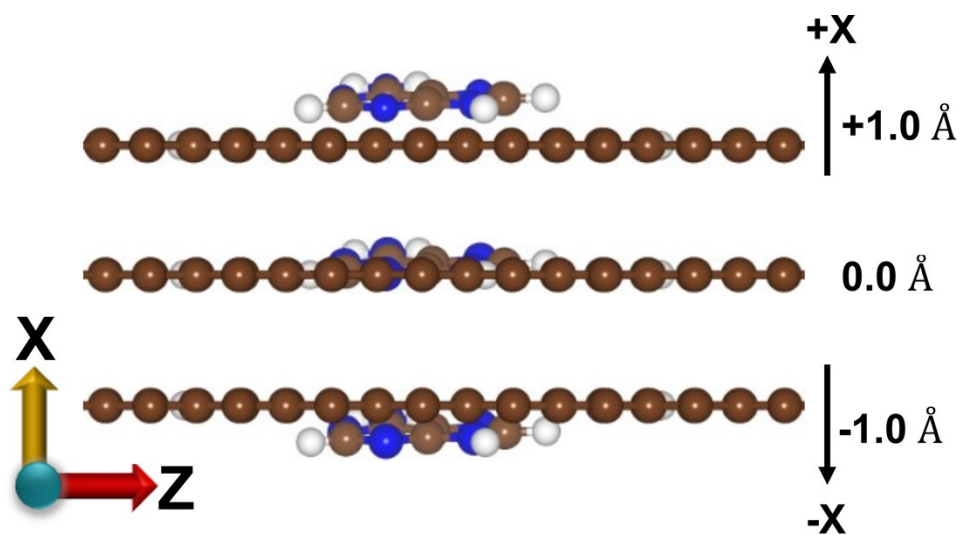

**Figure S6:** Scheme of A-nucleobase translated out-of-plane inside the graphene semi/hybrid-nanogap along the x-axis in positive and negative directions by  $\pm 1.0 \text{ \AA}$ .

7. Variation in the transmission Spectra of graphene semi/hybrid-nanogap+nucleobase systems due to in-plane rotations from  $0^\circ$  to  $180^\circ$  in the step of  $30^\circ$  along the  $x$ -axis in the  $yz$ -plane:

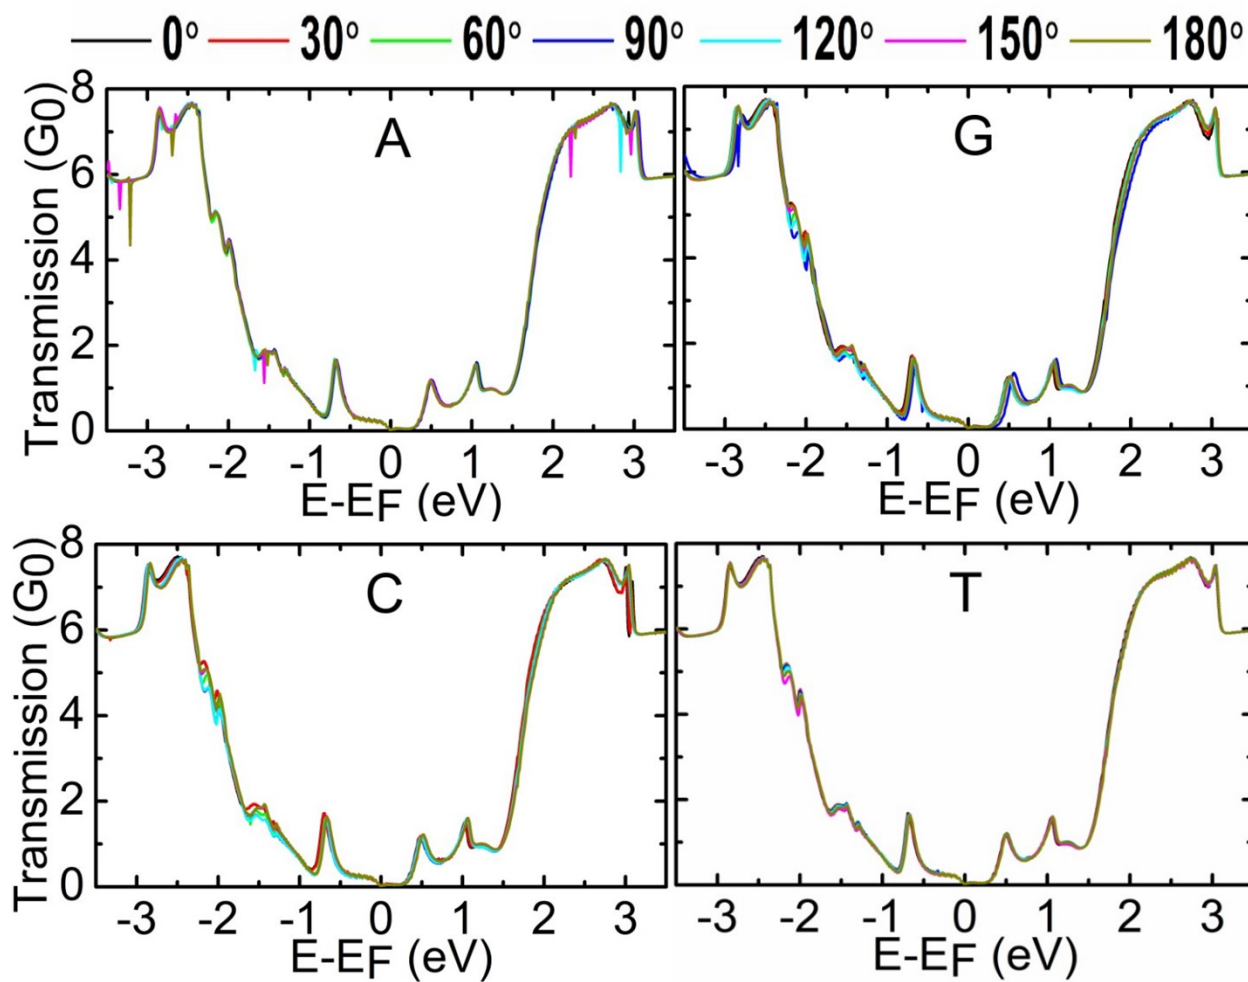

**Figure S7.** Variation in the transmission spectra due to in-plane rotation from  $0^\circ$  to  $180^\circ$  in steps of  $30^\circ$  along the  $x$ -axis in the  $yz$ -plane for all four nucleobases (A, G, C, T).

8. Change in the transmission function spectra of graphene semi/hybrid-nanogap+nucleobase systems due to in-plane lateral translations:

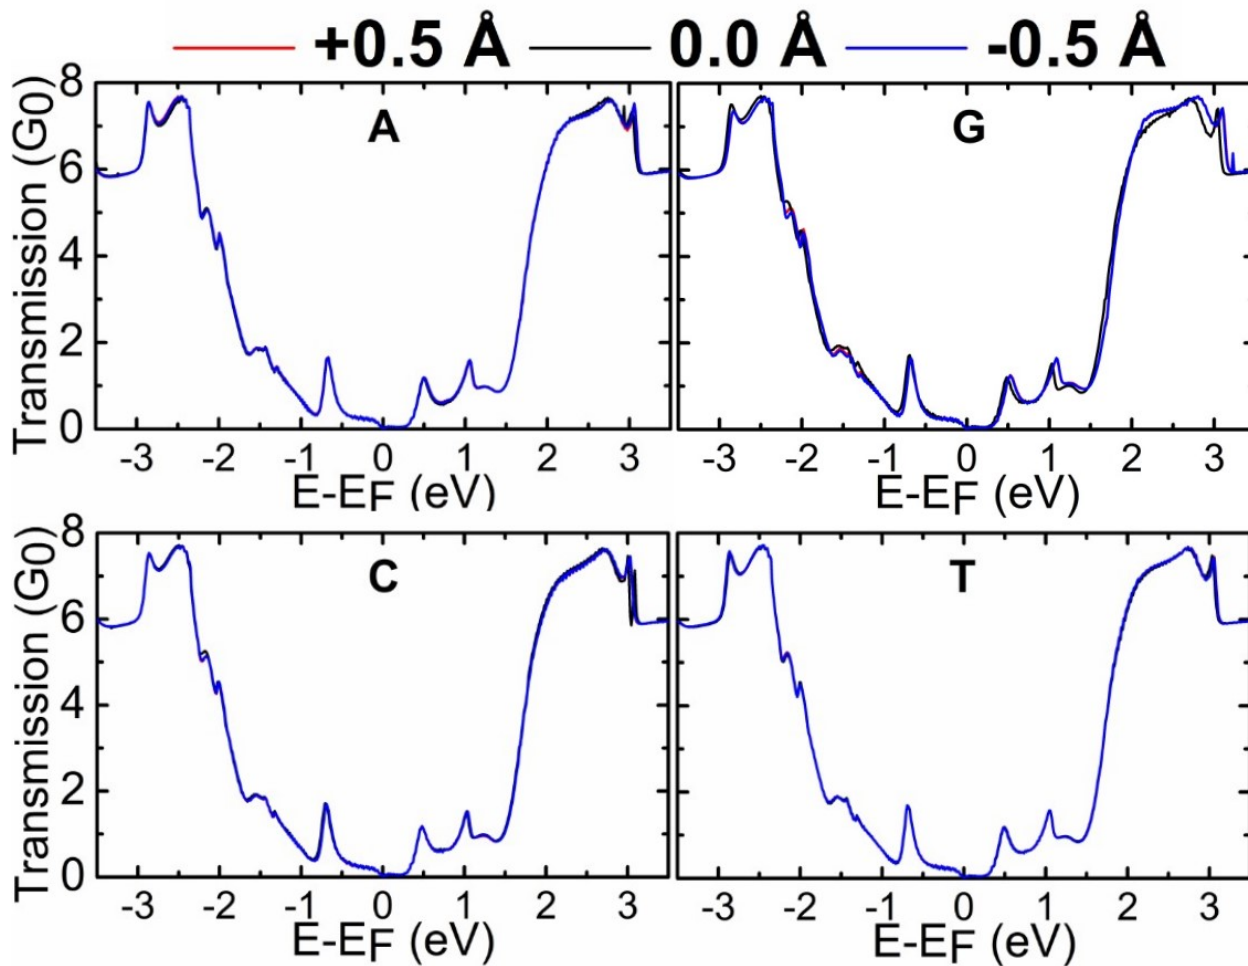

**Figure S8.** The change in the transmission function for each targeted nucleobase due to lateral in-plane translations ( $\pm 0.5$  Å).



9. Change in the transmission spectra of graphene semi/hybrid-nanogap+nucleobase systems due to out-of-plane translations:

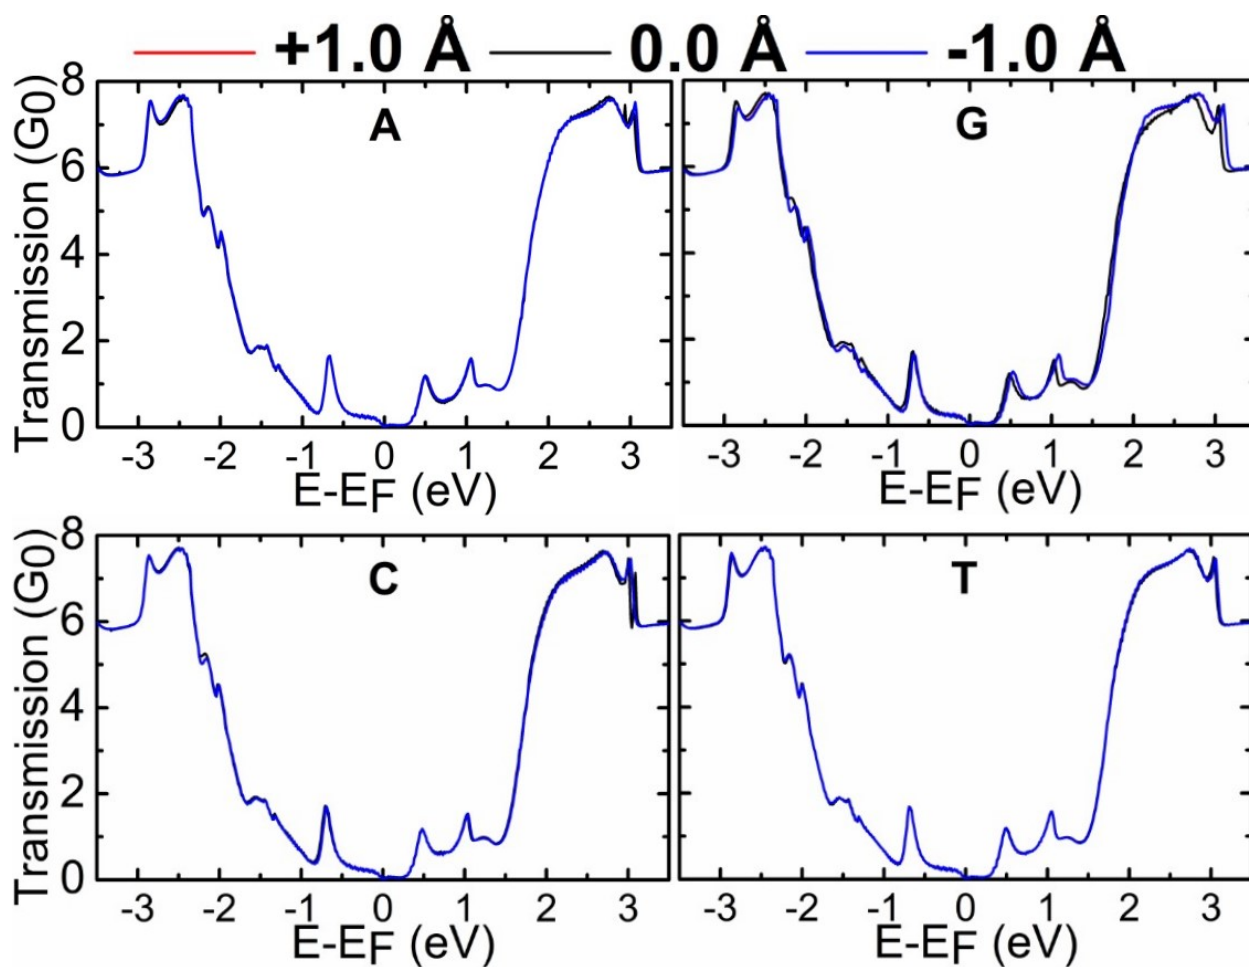

**Figure S9.** The change in the transmission function for each targeted nucleobase due to out-of-plane translations ( $\pm 1.0$  Å).
